# Supplementary material for: Amphiphilic phosphotungstate-paired ionic copolymer as a highly efficient catalyst for triphase epoxidation of alkenes with H2O2
Source: Royal Society of Chemistry journal article supplement (doi:10.1039/c3cy00883e), 2014-01-01
Supplement: c3cy00883e.pdf [file c3cy00883e.pdf]

## Supplementary Information

### Amphiphilic Phosphotungstate-paired ionic copolymer as highly efficient catalyst for triphase epoxidation of alkenes with H<sub>2</sub>O<sub>2</sub>

Yan Leng,<sup>\*a</sup> Jianghao Wu,<sup>a</sup> Pingping Jiang,<sup>a</sup> and Jun Wang<sup>b</sup>

<sup>a</sup> The Key Laboratory of Food Colloids and Biotechnology, Ministry of Education, School of Chemical and Material Engineering, Jiangnan University, Wuxi 214122, China. Fax: +86-510-85917763; Tel: +86-510-85917090; E-mail: lengyan1114@126.com

<sup>b</sup> State Key Laboratory of Materials-Oriented Chemical Engineering, College of Chemistry and Chemical Engineering, Nanjing University of Technology, Nanjing 210009, China.

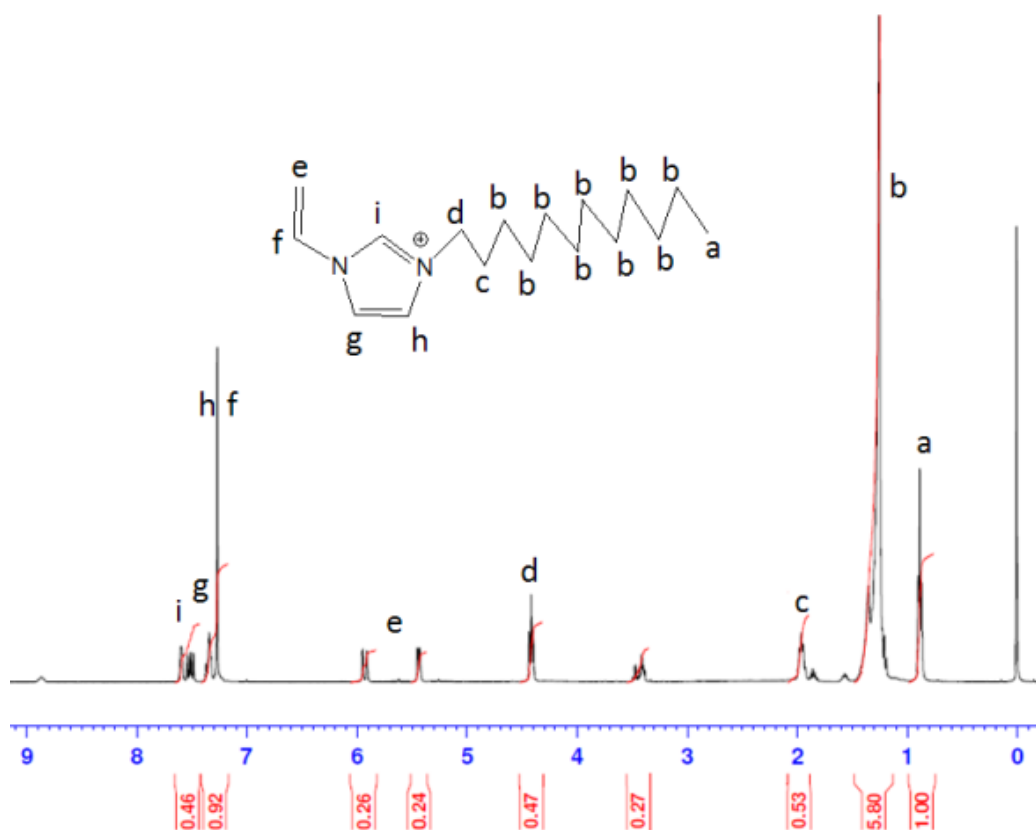

Figure S1. <sup>1</sup>H NMR of DIM.

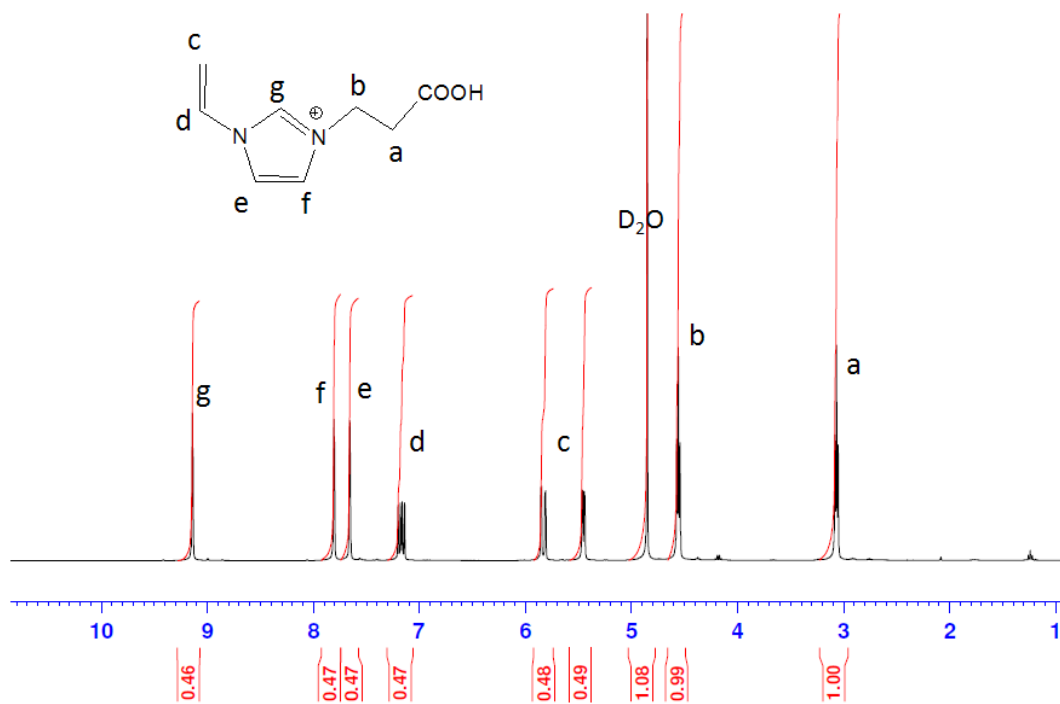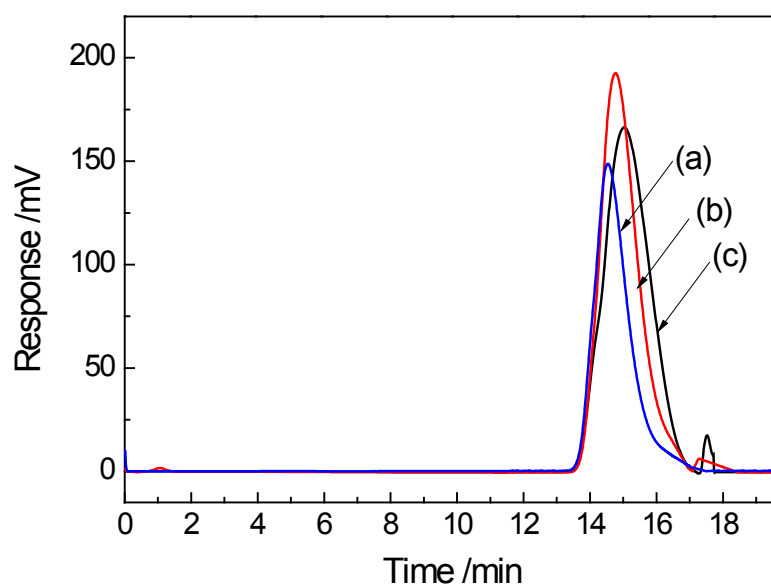

FigureS3. Differential refractive index (dRI) GPC trace of polymers (a) DIM-CIM, (b) CIM, and (c) DIM in DFM.

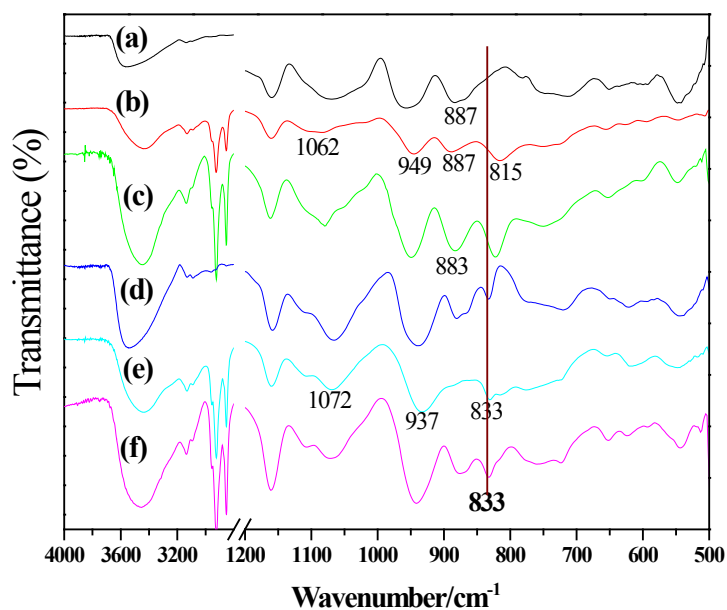

FigureS4. FT-IR spectra of (a) CIM-PW, (b) DIM-PW, (c) DIM-CIM-PW, (d) H<sub>2</sub>O<sub>2</sub>-treated CIM-PW, (e) H<sub>2</sub>O<sub>2</sub>-treated DIM-PW, (f) H<sub>2</sub>O<sub>2</sub>-treated DIM-CIM-PW.

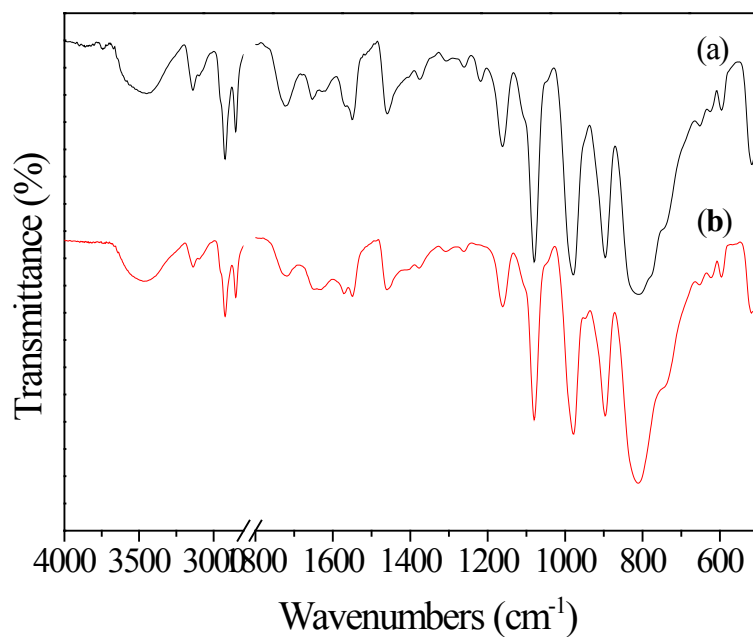

FigureS5. FT-IR spectra of (a) DIM-CIM-PW<sub>12</sub>O<sub>40</sub> and (b) H<sub>2</sub>O<sub>2</sub>-treated DIM-CIM-PW<sub>12</sub>O<sub>40</sub>.
